# Supplementary material
Source: PubMed Central journal article supplement (PMC56949)
Supplement: pnas_98_18_10261__1.pdf [file pnas_98_18_10261__1.pdf]

**Table 3. Cell-surface molecules expressed by MLN CD8+  $\alpha\beta$  T cells**

Gene expression values of a partial list of cell-surface molecules expressed by MLN CD8+  $\alpha\beta$  T cells ( $\alpha\beta$  T; averaged from all six samples), together with their expression values in  $\gamma\delta$  T lymphocytes in the intestinal intraepithelial layer ( $\gamma\delta$  IELs) ( $\gamma\delta$  T; averaged from all four samples). Genes called absent are indicated by A.

| $\alpha\beta$ T                   | $\gamma\delta$ T | Accession | Description             |
|-----------------------------------|------------------|-----------|-------------------------|
| <b>TCR/associated</b>             |                  |           |                         |
| 137                               | 15               | M26417    | TCR V8.2 $\beta$        |
| 55                                | A                | X06305    | TCR V $\alpha$          |
| <b>Cytokine/chemokine/similar</b> |                  |           |                         |
| 367                               | A                | L31580    | CCR7                    |
| 179                               | A                | M29697    | IL-7 receptor           |
| 115                               | 11               | X99581    | CXCR4                   |
| 72                                | A                | D10849    | Thromboxane A2 receptor |
| 64                                | A                | X53802    | IL-6 receptor           |
| 54                                | A                | U31993    | IL-17 receptor          |
| <b>Other surface molecules</b>    |                  |           |                         |
| 1653                              | 303              | M55561    | pB7                     |
| 822                               | 64               | M12379    | Thy-1                   |
| 454                               | A                | D86232    | Ly-6C                   |
| 298                               | A                | Y00023    | CD2                     |
| 264                               | A                | M25324    | L-Selectin              |
| 226                               | 16               | W20922    | CD97                    |
| 224                               | 26               | W13002    | Lectin L-14             |
| 220                               | A                | X04653    | Ly-6E                   |
| 164                               | A                | X85991    | Semaphorin B            |
| 148                               | A                | M15177    | CD5                     |
| 113                               | A                | U37543    | CD6                     |
| 84                                | A                | AA118715  | CD97                    |
| 63                                | A                | M60778    | LFA-1                   |
| 60                                | 12               | AA072961  | CD47                    |
| 50                                | A                | AA028405  | ICAM-2                  |
