# Supplementary material
Source: PubMed Central journal article supplement (PMC56949)
Supplement: pnas_98_18_10261__3.pdf [file pnas_98_18_10261__3.pdf]

Table 4. Fifteen most abundantly expressed genes in  $\gamma\delta$  IELs, MLN CD8+  $\alpha\beta$  T cells, and epithelial cells

Gene expression values for the 15 most highly expressed genes in  $\gamma\delta$  IELs ( $\gamma\delta$  T; averaged from all four samples), MLN CD8+  $\alpha\beta$  T cells ( $\alpha\beta$  T; averaged from all six samples), and epithelial cells (Epi) are shown.

| $\gamma\delta$ IELs |                 |      |                       | MLN CD8+ $\alpha\beta$ T cells |                 |      |                        |
|---------------------|-----------------|------|-----------------------|--------------------------------|-----------------|------|------------------------|
| $\gamma\delta$ T    | $\alpha\beta$ T | Epi  | Description           | $\gamma\delta$ T               | $\alpha\beta$ T | Epi. | Description            |
| 6853                | 15236           | 3843 | Trt (21 kDa)          | 6853                           | 15236           | 3843 | Trt (21 kDa)           |
| 3795                | 5230            | 1547 | Ubiquitin             | 1944                           | 9792            | 192  | Gnb2-rs1               |
| 3065                | 566             | A    | RANTES                | 1177                           | 6645            | 133  | Ribosomal protein PO   |
| 2643                | 4612            | 1258 | $\beta$ actin         | 3795                           | 5230            | 1547 | Ubiquitin              |
| 2630                | 116             | 19   | Granzyme A            | 2358                           | 5022            | 1259 | $\beta$ actin          |
| 2331                | 3213            | 369  | Prothymosin $\beta$ 4 | 1044                           | 4183            | 108  | Ribosomal protein L5   |
| 2117                | 59              | 8    | Granzyme B            | 2331                           | 3213            | 369  | Prothymosin $\beta$ 4  |
| 1944                | 9792            | 192  | Gnb2-rs1              | 980                            | 2954            | 70   | Repeat family 3 gene   |
| 1823                | 2093            | 726  | Ubiquitin C           | 715                            | 2932            | 81   | Ribosomal protein S5   |
| 1321                | 21              | A    | TCR $\gamma$ chain    | 1115                           | 2777            | 66   | Ribosomal protein L27a |
| 1310                | 2349            | 100  | Ribosomal protein S16 | 535                            | 2771            | 32   | Ribosomal protein L36  |
| 1290                | 170             | A    | CD7                   | 666                            | 2428            | 115  | Ribosomal protein fau  |
| 1251                | 353             | 271  | ATF4                  | 736                            | 2401            | 48   | Ribosomal protein L6   |
| 1234                | 1117            | 272  | $\gamma$ actin        | 1310                           | 2349            | 100  | Ribosomal protein S16  |
| 1207                | 21              | 12   | RGS1                  | 941                            | 2317            | 45   | Ribosomal protein L3   |

  

| Epithelial cells |                 |      |                              |
|------------------|-----------------|------|------------------------------|
| $\gamma\delta$ T | $\alpha\beta$ T | Epi. | Description                  |
| 6853             | 15236           | 3843 | Trt (21 kDa)                 |
| 816              | A               | 2670 | FABP2, intestinal            |
| 79               | A               | 1567 | Trefoil factor 3, intestinal |
| 3795             | 5230            | 1547 | Ubiquitin                    |
| 2358             | 5022            | 1259 | $\beta$ actin                |
| 109              | A               | 842  | CD13/aminopeptidase N        |
| 336              | 372             | 835  | Prothymosin $\beta$ 4        |
| 153              | A               | 810  | FABP1, liver                 |
| 199              | A               | 749  | Apolipoprotein A-I           |
| 1823             | 2093            | 726  | Ubiquitin C                  |
| 71               | A               | 599  | Cytokeratin EndoA            |
| 396              | 427             | 592  | Thioredoxin                  |
| 493              | 930             | 590  | ATP synthase, F1, $\beta$    |
| 383              | 128             | 564  | Selenoprotein P              |
| 89               | 2               | 526  | Apolipoprotein A-IV          |
