# Supplementary material
Source: PubMed Central journal article supplement (PMC56949)
Supplement: pnas_98_18_10261__4.pdf [file pnas_98_18_10261__4.pdf]

Table 5. Genes up- or down-regulated in  $\gamma\delta$  IELs after *Yersinia* infection

Gene expression values are shown for genes with 1.4-fold or greater differences in the expression levels identified from  $\gamma\delta$  IEL samples isolated from uninfected (Un) and *Yersinia*-infected (Inf) animals. To identify genes differentially expressed between  $\gamma\delta$  IELs from infected and uninfected mice, ANOVA tests were carried out by comparing individual probe pairs from the GENECHIP arrays. To be considered differentially expressed, genes had to (i) have a p value <  $7.87 \times 10^{-6}$  (60 / 6,352 genes met this criterion), (ii) be called "present" or "moderate" in at least one  $\gamma\delta$  IEL sample, according to GENECHIP 3.0 software (58 / 60 remaining genes), (iii) have an absolute difference in median expression of at least 10 between the two populations from infected and uninfected mice (54 / 58 genes), and (iv) exhibit at least a 1.4-fold change between infected and uninfected samples. Of 6,352 genes tested, 37 met these criteria, 6 being increased after infection and 31 being decreased after infection.

| Un                                                   | Inf  | Accession | Description                                                   |
|------------------------------------------------------|------|-----------|---------------------------------------------------------------|
| Genes up-regulated after <i>Yersinia</i> infection   |      |           |                                                               |
| 5441                                                 | 8264 | X06407    | Translationally regulated transcript (21 kDa) (Trt)           |
| 445                                                  | 625  | D00472    | Cofilin 1, non muscle (Cf1)                                   |
| 111                                                  | 156  | U27340    | Prosaposin (SGP-1)                                            |
| 62                                                   | 113  | AA145371  | Interferon-induced protein 6-16 precursor (IFI-6-16), homolog |
| 65                                                   | 108  | L25885    | $\beta$ 1,4 N-acetylgalactosaminyltransferase (Galgt1)        |
| 34                                                   | 48   | W40735    | EH domain-containing protein EHD1 (mPAST1), homolog           |
| Genes down-regulated after <i>Yersinia</i> infection |      |           |                                                               |
| 972                                                  | 590  | U12236    | Integrin alpha-E                                              |
| 614                                                  | 337  | U58494    | Intracisternal A-particle mRNA (5' to the IL-3 gene)          |
| 451                                                  | 281  | U58888    | SH3P2 protein (osteoclast stimulating factor 1, homolog)      |
| 239                                                  | 137  | AA114811  | ATP synthase $\gamma$ -subunit, homolog                       |
| 238                                                  | 160  | AA008136  | $\alpha$ -actinin 4, homolog                                  |
| 212                                                  | 139  | AA123463  | SET protein (I2PP2A), homolog                                 |
| 211                                                  | 130  | U09351    | Stat4                                                         |
| 203                                                  | 86   | W13875    | Myosin regulatory light chain, homolog                        |
| 181                                                  | 136  | D37837    | Plastin 2, L (Pls2)                                           |
| 172                                                  | 72   | U50413    | PI-3-kinase, regulatory subunit p85 $\alpha$                  |
| 164                                                  | 103  | W29730    | Protein phosphatase 1 $\alpha$ , homolog                      |
| 161                                                  | 86   | U10484    | Lymphoid-restricted membrane protein (Jaw1)                   |
| 135                                                  | 50   | W35962    | Suppressor of Ty 4 (Supt4h), homolog                          |
| 134                                                  | 75   | W83337    | Glutathione peroxidase 4, homolog                             |
| 124                                                  | 53   | M60285    | cAMP-responsive element modulator                             |
| 121                                                  | 79   | AA152884  | Heat shock protein, DNAJ-like 2 (Hsj2)                        |
| 119                                                  | 76   | AA168184  | Core promoter-binding protein                                 |
| 111                                                  | 61   | X89749    | TG interacting factor                                         |
| 110                                                  | 57   | AA003990  | Splicing factor, arginine/serine-rich 7, homolog              |
| 92                                                   | 57   | U41736    | Ancient ubiquitous protein (Aup1)                             |
| 75                                                   | 36   | D87990    | UDP-galactose transporter related isozyme 1                   |
| 75                                                   | 42   | W29669    | TIS7/PC4, homolog                                             |
| 72                                                   | 32   | U54803    | Cysteine protease (Lice)                                      |
| 63                                                   | 34   | X05719    | CD152 antigen (CTLA-4)                                        |
| 57                                                   | 28   | W46019    | 14-3-3 protein $\theta$ -subtype, homolog                     |
| 48                                                   | 16   | AA162093  | DEAD/H box polypeptide 15 (RNA helicase A)                    |
| 46                                                   | 33   | X59421    | Friend leukemia integration 1 (Fli1)                          |
| 45                                                   | 19   | AA105582  | CD53 (OX-44), homolog                                         |
| 39                                                   | 20   | AA008095  | General transcription factor 2-I, homolog                     |
| 34                                                   | 16   | D83585    | Proteasome (prosome, macropain) subunit, $\beta$ type 7       |
| 32                                                   | 9    | D87691    | Eukaryotic polypeptide chain release factor 1 (eRF1)          |
