# Supplementary material
Source: PubMed Central journal article supplement (PMC56949)
Supplement: pnas_98_18_10261__5.pdf [file pnas_98_18_10261__5.pdf]

Table 6. Genes up-regulated in MLN CD8+  $\alpha\beta$  T cells after *Yersinia* infection

Gene expression values are shown for genes expressed at least 2-fold higher in cells isolated from *Yersinia*-infected uninfected (Un) animals. The criteria were determined as follows: genes had to be called present with minimum e than 30 in at least one of the duplicate samples of  $\alpha\beta$  T cells isolated from either *Yersinia*-infected or uninfected m values of the resulting genes were averaged.

| Un                                             | Inf | Accession | Description                                              | Un                             | Inf | Accession |
|------------------------------------------------|-----|-----------|----------------------------------------------------------|--------------------------------|-----|-----------|
| <b>Effector functions</b>                      |     |           |                                                          | <b>Surface molecules</b>       |     |           |
| 139                                            | 779 | U02298    | RANTES                                                   | 68                             | 301 | W1300     |
| A                                              | 173 | M13226    | Granzyme A                                               | 128                            | 255 | X1750     |
| A                                              | 87  | X04072    | Granzyme B                                               | 36                             | 85  | X1683     |
| 27                                             | 71  | U29875    | Flt3 ligand                                              | 43                             | 76  | Y0076     |
| <b>Activation, proliferation, cell cycle</b>   |     |           |                                                          | 17                             | 40  | X6990     |
| <b>Signal transduction and</b>                 |     |           |                                                          | <b>Signal transduction and</b> |     |           |
| 153                                            | 325 | X07699    | Nucleolin                                                | 50                             | 98  | X5531     |
| 56                                             | 303 | X04653    | Ly-6E                                                    | 34                             | 81  | U5073     |
| 64                                             | 114 | U43918    | Proliferation-associated protein 1 (p38-2G4)             | 41                             | 75  | AA116     |
| 56                                             | 108 | D26091    | CDC47                                                    | 39                             | 75  | X6020     |
| 51                                             | 99  | L41495    | Pim-2                                                    | 33                             | 74  | X5139     |
| 14                                             | 80  | D00208    | CDKN2A/INK4a/MTS1                                        | 36                             | 73  | U3735     |
| 22                                             | 73  | AA117100  | Stathmin                                                 | 39                             | 68  | U2880     |
| 21                                             | 55  | U30509    | $\gamma$ -Glutamyl transpeptidase (Ggtp)                 | 28                             | 55  | W8288     |
| 21                                             | 52  | X58876    | Mdm2                                                     | 18                             | 39  | X8093     |
| 26                                             | 48  | L16462    | A1                                                       | 17                             | 37  | AA008     |
| 18                                             | 40  | AA120142  | Replication factor C (activator 1), homolog              | 21                             | 36  | X7132     |
| A                                              | 38  | X82786    | Ki-67                                                    | 15                             | 32  | L2811     |
| <b>Chromosomal structure</b>                   |     |           |                                                          | <b>Other</b>                   |     |           |
| 144                                            | 431 | Z46757    | HMG2                                                     | 226                            | 448 | AA002     |
| 55                                             | 141 | X12944    | HMG17                                                    | 173                            | 388 | W3429     |
| A                                              | 46  | X56683    | Chromobox homolog 3                                      | 146                            | 303 | D3837     |
| 166                                            | 306 | X53476    | HMG14                                                    | 131                            | 267 | AA027     |
| <b>Protein synthesis/degradation/targeting</b> |     |           |                                                          | 74                             | 159 | AA002     |
| 126                                            | 214 | X70303    | Proteasome (prosome, macropain) subunit, $\alpha$ type 2 | 53                             | 103 | U0580     |
| 115                                            | 190 | AA146437  | Cathepsin S                                              | 35                             | 98  | D1002     |
| 86                                             | 169 | Z37164    | Cytosolic chaperone containing TCP-1, $\theta$ subunit   | 42                             | 98  | X5702     |
| 59                                             | 158 | X52886    | Cathepsin D                                              | 40                             | 93  | W9987     |
| 54                                             | 99  | X53824    | Splicing factor Srp20/X16                                | 36                             | 73  | U1417     |
| 54                                             | 91  | Z14044    | Valosin containing protein (VCP)                         | 25                             | 63  | Z4804     |
| 31                                             | 74  | U19854    | Ubiquitin-conjugating enzyme E2H (E20-20K)               | 29                             | 60  | L3297     |
| 22                                             | 60  | X90875    | FXR1                                                     | 29                             | 58  | D8879     |
| 17                                             | 52  | AA146248  | U2-snRNP b" (pRNP31), homolog                            | 25                             | 51  | Z1191     |
| A                                              | 51  | U21549    | Ac39/physophilin                                         | 22                             | 42  | U1911     |
| 26                                             | 47  | AA002605  | KDEL receptor, homolog                                   | A                              | 39  | X7887     |
| 22                                             | 45  | X60831    | rRNA transcription factor Ubf                            | 14                             | 34  | X9765     |
| A                                              | 42  | AA003841  | Splicing factor SF3a60, homolog                          |                                |     |           |
| 12                                             | 42  | X56602    | Interferon-induced 15-kDa protein (ISG15)                |                                |     |           |
| A                                              | 29  | U05837    | $\beta$ -N-acetylhexosaminidase, alpha-subunit           |                                |     |           |
