# Supplementary material
Source: PubMed Central journal article supplement (PMC56949)
Supplement: pnas_98_18_10261__6.pdf [file pnas_98_18_10261__6.pdf]

Table 7. Genes preferentially expressed in  $\gamma\delta$  IELs

A list of genes identified as being more abundantly expressed in  $\gamma\delta$  IELs than MLN CD8+  $\alpha\beta$  T cells by ANOVA. Average gene expression values are shown for  $\gamma\delta$  IELs ( $\gamma\delta$  T), MLN CD8+  $\alpha\beta$  T cells ( $\alpha\beta$  T), and epithelial cells (Epi). Because differences in gene expression between the infected and uninfected samples of the  $\alpha\beta$  and  $\gamma\delta$  T cells were small, all four  $\gamma\delta$  IEL samples were compared against all six MLN CD8+  $\alpha\beta$  T cell samples by ANOVA tests. In all, 235 genes fit the following criteria. These genes (i) have a p value <  $7.87 \times 10^{-6}$  (1,206 / 6,352 genes), (ii) are more highly expressed in  $\gamma\delta$  than in  $\alpha\beta$  T cells (449 / 1,206 genes), (iii) are called "present" or "moderate" in at least two  $\gamma\delta$  IEL samples (344 / 449 genes), (iv) have a difference in median expression of at least 15 between the  $\gamma\delta$  and  $\alpha\beta$  T cell samples (246 / 344 genes), and (v) show at least a 1.5-fold difference in median expression between the  $\gamma\delta$  and  $\alpha\beta$  T cell samples (235 / 246 genes). To avoid large differences in expression because of negative or very small values in  $\alpha\beta$  T cell gene expression, all  $\alpha\beta$  T cell expression values < 1 were made equal to 1 before calculating the absolute and fold differences in steps (iv) and (v).

#### Immune defense mediators

| $\gamma\delta$ T                  | $\alpha\beta$ T | Epi. | Accession | P value  | Description                                           |
|-----------------------------------|-----------------|------|-----------|----------|-------------------------------------------------------|
| <b>Cytokines/chemokines</b>       |                 |      |           |          |                                                       |
| 3065                              | 566             | A    | U02298    | 1.40E-73 | RANTES                                                |
| 215                               | 49              | A    | D43769    | 7.59E-40 | Lymphotoxin                                           |
| 58                                | 25              | A    | W29669    | 3.71E-14 | TIS7/PC4, homolog                                     |
| 39                                | A               | A    | M73061    | 3.11E-15 | MIP-1 $\alpha$                                        |
| 38                                | A               | A    | M23503    | 4.78E-50 | MIP-1 $\beta$                                         |
| 36                                | A               | A    | X16151    | 6.44E-33 | Secreted phosphoprotein 1 (eta-1/osteopontin)         |
| 30                                | A               | A    | M32745    | 1.29E-11 | Transforming growth factor, $\beta$ 3                 |
| 22                                | 8               | A    | J00424    | 1.31E-20 | TIS7/PC4/interferon-related developmental regulator 1 |
| <b>Cytotoxic proteins/related</b> |                 |      |           |          |                                                       |
| 2630                              | 116             | 19   | M13226    | 4.70E-95 | Granzyme A                                            |
| 2117                              | 59              | 8    | X04072    | 1.32E-99 | Granzyme B                                            |
| 583                               | 258             | 22   | X16133    | 1.79E-12 | Serglycin                                             |
| 275                               | A               | A    | U06948    | 9.12E-79 | Fas Ligand                                            |
| 222                               | 8               | 153  | M33225    | 1.06E-64 | Cryptdin                                              |
| 25                                | A               | 107  | M33226    | 1.77E-12 | Defensin-related sequence cryptdin peptide (CRS1C)    |
| 22                                | A               | A    | X58861    | 2.12E-06 | Complement CiQ $\alpha$ chain                         |
| <b>Enzymes, inflammation</b>      |                 |      |           |          |                                                       |
| 174                               | 97              | 19   | M63848    | 1.65E-14 | Leukotriene A-4 hydrolase                             |
| 73                                | 35              | 40   | L11455    | 1.90E-14 | p47phox                                               |

#### Cell-surface molecules

| $\gamma\delta$ T                          | $\alpha\beta$ T | Epi. | Accession | P value   | Description                         |
|-------------------------------------------|-----------------|------|-----------|-----------|-------------------------------------|
| <b>TCR/associated</b>                     |                 |      |           |           |                                     |
| 1321                                      | 21              | A    | M12836    | 1.65E-111 | TCR $\gamma$ chain, constant region |
| 740                                       | 11              | A    | L36135    | 1.84E-92  | TCR $\delta$ chain, constant region |
| 71                                        | 18              | A    | AA118701  | 1.14E-16  | TCR $\delta$ chain, variable region |
| 62                                        | A               | A    | AA119287  | 3.39E-14  | TCR $\delta$ chain, variable region |
| 726                                       | 394             | A    | Y00635    | 5.40E-11  | CD3- $\gamma$                       |
| 597                                       | 16              | 17   | W41745    | 1.32E-110 | Fc-epsilon-R1 $\gamma$ subunit      |
| <b>NK Activating/inhibitory receptors</b> |                 |      |           |           |                                     |
| 182                                       | A               | A    | L19057    | 2.57E-71  | NK cell receptor 2B4                |
| 138                                       | A               | A    | X98113    | 2.15E-76  | LAG-3                               |

#### Intestinal function and homeostasis

| $\gamma\delta$ T | $\alpha\beta$ T | Epi. | Accession | P value  | Description                                                |
|------------------|-----------------|------|-----------|----------|------------------------------------------------------------|
| 289              | A               | A    | K00811    | 1.56E-77 | Carbonic anhydrase isozyme II                              |
| 226              | A               | A    | M16238    | 2.33E-74 | Fibrinogen-like protein                                    |
| 152              | 8               | A    | M64085    | 9.32E-58 | Spi2/EB1 proteinase inhibitor                              |
| 116              | A               | A    | L26489    | 4.67E-35 | Furin                                                      |
| 116              | 59              | A    | AA089339  | 3.74E-06 | Cystatin 7 (Cst7/leukocystatin)                            |
| 91               | A               | A    | M27347    | 1.17E-49 | p6-5 (preproelastase, homolog)                             |
| 21               | A               | A    | U57746    | 3.58E-12 | Platelet-activating factor acetylhydrolase, 1b, a1 subunit |
| 23               | A               | 42   | L19932    | 4.96E-14 | $\beta$ ig-h3                                              |
| 45               | A               | 91   | AA145127  | 1.04E-11 | Monocyte/neutrophil elastase inhibitor, homolog            |
| 108              | A               | 111  | AA106468  | 5.93E-14 | Serine protease inhibitor, Kazal type 3 (Spink3)           |
| 165              | 14              | 150  | M22679    | 2.34E-33 | Alcohol dehydrogenase class I (ADH-A-2)                    |
| 104              | A               | 297  | L15193    | 7.31E-31 | Meprin 1 $\beta$                                           |
| 79               | A               | 1567 | D38410    | 1.60E-26 | Trefoil Factor 3, intestinal (Tff3)                        |

#### Cholesterol/Lipid biosynthesis and metabolism

| $\gamma\delta$ T | $\alpha\beta$ T | Epi. | Accession | P value  | Description                              |
|------------------|-----------------|------|-----------|----------|------------------------------------------|
| 110              | A               | A    | D00466    | 1.21E-20 | Apolipoprotein E                         |
| 66               | 27              | A    | AA036251  | 1.20E-16 | Farnesyl diphosphate synthase, homolog   |
| 65               | 16              | A    | D29016    | 1.90E-13 | Squalene synthase                        |
| 61               | 11              | A    | U37226    | 1.71E-27 | Plasma phospholipid binding protein      |
| 54               | 29              | A    | U21489    | 2.86E-11 | Acetyl CoA dehydrogenase, long-chain     |
| 51               | A               | A    | X64414    | 2.76E-39 | LDL receptor                             |
| 50               | A               | A    | D42048    | 1.18E-37 | Squalene epoxidase                       |
| 44               | 23              | A    | M26270    | 3.34E-08 | Stearoyl-coenzyme A desaturase 2         |
| 38               | A               | A    | M93275    | 3.53E-06 | Adipose differentiation related protein  |
| 22               | A               | 48   | AA014996  | 2.53E-14 | Apolipoprotein B (ApoB), homolog         |
| 26               | A               | 40   | M13366    | 3.13E-07 | Glycerophosphate dehydrogenase           |
| 35               | A               | 41   | AA016485  | 1.04E-10 | Hydroxysteroid sulfotransferase (SULT2B) |
| 38               | A               | 187  | W17412    | 4.05E-26 | Apolipoprotein A-I/C-III, 5'             |
| 44               | A               | 406  | U00938    | 2.76E-35 | Ileal lipid binding protein              |
| 51               | A               | 356  | Z22216    | 6.31E-21 | Apolipoprotein C-II                      |
| 89               | A               | 526  | M64250    | 1.40E-42 | Apolipoprotein A-IV                      |
| 101              | 39              | 125  | D29639    | 2.99E-13 | 3-hydroxyacyl CoA dehydrogenase          |

|                            |     |     |          |          |                                       |
|----------------------------|-----|-----|----------|----------|---------------------------------------|
| 87                         | A   | A   | U10091   | 1.23E-47 | Ly-49E-GE (Klra5)                     |
| 58                         | A   | A   | U05265   | 1.38E-15 | NK cell receptor gp49B                |
| 55                         | A   | 13  | X67914   | 1.54E-12 | PD-1/programmed cell death 1          |
| 49                         | A   | A   | X05719   | 8.99E-47 | CTLA-4                                |
| 38                         | A   | A   | M77753   | 2.81E-43 | NK cell receptor NKR-P1A              |
| Cytokine/chemokine/similar |     |     |          |          |                                       |
| 262                        | 46  | A   | M59378   | 2.24E-59 | Tumor necrosis factor receptor 2      |
| 125                        | 49  | 100 | X57796   | 3.36E-39 | Tumor necrosis factor receptor 1      |
| 225                        | 91  | 30  | J05265   | 4.99E-26 | Interferon $\gamma$ receptor          |
| 209                        | 70  | A   | M28052   | 1.40E-40 | IL-2 receptor, $\beta$ chain          |
| 31                         | A   | A   | U23922   | 8.83E-14 | IL-12 receptor, $\beta$ 1             |
| 40                         | A   | A   | AA034646 | 2.48E-16 | L-CCR chemokine receptor              |
| 62                         | A   | A   | D13458   | 9.72E-59 | Prostaglandin E receptor, EP4 subtype |
| Other surface molecules    |     |     |          |          |                                       |
| 1290                       | 170 | A   | D31956   | 5.83E-65 | CD7                                   |
| 781                        | 152 | 14  | U12236   | 4.51E-44 | Integrin $\alpha$ -E                  |
| 335                        | 111 | 62  | U25708   | 1.42E-51 | CD98, heavy chain                     |
| 268                        | 69  | 304 | X16834   | 5.49E-58 | Mac-2                                 |
| 177                        | A   | 280 | M76124   | 4.27E-51 | EGP314                                |
| 166                        | A   | A   | Y00864   | 1.32E-64 | c-kit                                 |
| 109                        | A   | 842 | U77083   | 1.47E-32 | CD13/aminopeptidase N                 |
| 96                         | 50  | A   | L22143   | 1.57E-12 | Insulin-like growth factor II         |
| 85                         | 27  | A   | X55184   | 1.78E-24 | Immune suppressor factor TJ6          |
| 81                         | 16  | A   | M33581   | 1.37E-48 | Multidrug resistance protein 1a       |
| 79                         | 35  | A   | U39827   | 2.50E-10 | TDAG8/Gpcr25                          |
| 74                         | 35  | 61  | W08454   | 3.42E-12 | Tetraspanin TM4-A, homolog            |
| 65                         | A   | 268 | V01527   | 1.89E-14 | MHC class II, IA- $\beta$             |
| 64                         | A   | 144 | J04634   | 1.81E-14 | Cell surface antigen 114/A10          |
| 62                         | A   | 35  | X60961   | 9.60E-25 | E-cadherin                            |
| 61                         | 33  | A   | U07890   | 2.89E-06 | Flotillin 2                           |
| 47                         | A   | 38  | M29961   | 2.62E-12 | Glutamyl Aminopeptidase               |
| 38                         | A   | 6   | AA008624 | 8.52E-33 | Integrin $\alpha$ -1, homolog         |
| 27                         | 4   | 11  | AA170355 | 1.05E-16 | Integrin $\alpha$ -X                  |
| 23                         | A   | A   | L11332   | 1.44E-11 | CD38                                  |

#### Other

| $\gamma\delta$ T   | $\alpha\beta$ T | Epi. | Accession | P value  | Description                            |
|--------------------|-----------------|------|-----------|----------|----------------------------------------|
| Cytoskeletal       |                 |      |           |          |                                        |
| 158                | 77              | 245  | D10024    | 7.64E-11 | Annexin II                             |
| 71                 | A               | 599  | X12789    | 9.63E-13 | Cytokeratin 8 (endo A)                 |
| 59                 | 27              | A    | X97650    | 3.47E-07 | Myosin If                              |
| 56                 | 8               | 63   | X59990    | 4.79E-36 | $\alpha$ -Catenin                      |
| 55                 | 38              | A    | AA032596  | 2.75E-06 | Kinesin light chain isoform D, homolog |
| 50                 | A               | 196  | M98454    | 3.71E-34 | Villin                                 |
| 41                 | A               | A    | U04354    | 2.36E-55 | Scinderin                              |
| 39                 | A               | A    | X61452    | 5.13E-23 | Peanut-like 2 homolog/H5 septin        |
| 29                 | A               | 33   | U49739    | 3.59E-32 | Myosin VI                              |
| Enzymes, metabolic |                 |      |           |          |                                        |
| 107                | 48              | 282  | X53333    | 8.04E-21 | Triosephosphate isomerase              |
| 89                 | 34              | 37   | X13752    | 1.19E-29 | Porphobilinogen synthase               |
| 80                 | 24              | 29   | X64837    | 3.90E-09 | Ornithine aminotransferase             |

|     |   |      |          |          |                                        |
|-----|---|------|----------|----------|----------------------------------------|
| 153 | A | 810  | AA087320 | 4.59E-41 | Fatty acid-binding protein (L-FABP)    |
| 199 | A | 749  | X64263   | 2.30E-32 | Apolipoprotein A-I/C-III               |
| 816 | A | 2670 | M65034   | 1.61E-34 | Fatty acid-binding protein, intestinal |

#### Signal transduction

| $\gamma\delta$ T | $\alpha\beta$ T | Epi. | Accession | P value  | Description                                               |
|------------------|-----------------|------|-----------|----------|-----------------------------------------------------------|
| 1207             | 21              | A    | AA154742  | 1.57E-90 | Regulator of G-protein signaling 1 (RGS1)                 |
| 1020             | A               | A    | AA138863  | 2.34E-70 | Regulator of G-protein signaling 1 (RGS1)                 |
| 620              | 101             | 77   | X61940    | 9.18E-68 | MAPK phosphatase 1 (3CH134)                               |
| 479              | 308             | 27   | M90388    | 1.59E-42 | 70zpep protein tyrosine phosphatase                       |
| 337              | 195             | A    | U08378    | 1.79E-10 | Stat3/APRF                                                |
| 271              | 94              | 113  | M13945    | 6.20E-47 | Pim-1                                                     |
| 185              | 41              | 17   | L16462    | 8.19E-12 | A1                                                        |
| 155              | 62              | A    | U52044    | 1.03E-20 | SH2 containing inositol-5-phosphatase (Ship)              |
| 123              | 77              | A    | Y08135    | 1.08E-20 | ASM-like phosphodiesterase 3a                             |
| 122              | 14              | A    | U50413    | 4.48E-33 | PI-3-kinase, regulatory subunit p85 $\alpha$              |
| 22               | A               | A    | AA111021  | 2.93E-06 | PI-3-kinase, catalytic subunit, $\beta$ , homolog         |
| 109              | 55              | A    | U36799    | 6.69E-23 | Rb2/p130                                                  |
| 36               | A               | A    | M26391    | 1.31E-28 | Rb1/p105Rb                                                |
| 105              | 36              | A    | D78141    | 9.47E-30 | TNF receptor-associated factor 5 (Traf5)                  |
| 98               | 59              | A    | Y09010    | 1.11E-06 | Serine/threonine kinase (MAP4K1, homolog)                 |
| 95               | 28              | A    | X61434    | 8.16E-37 | cAMP-dependent protein kinase, $\beta$ -catalytic subunit |
| 39               | 27              | A    | M19960    | 2.61E-07 | cAMP-dependent protein kinase, $\alpha$ subunit           |
| 88               | A               | A    | M60285    | 6.05E-33 | cAMP-responsive element modulator                         |
| 86               | 50              | A    | L13103    | 1.55E-07 | MAP kinase kinase kinase 1 (Mekk1)                        |
| 86               | 41              | A    | M63660    | 1.29E-10 | Guanine nucleotide binding protein, $\alpha$ 13           |
| 66               | 26              | 91   | Z14249    | 7.30E-18 | Mitogen activated protein kinase (erk-1)                  |
| 61               | 27              | 51   | M22326    | 8.13E-11 | Early growth response 1 (Egr1/zif/268)                    |
| 61               | 17              | A    | D31943    | 3.26E-14 | Cytokine-inducible SH2-containing protein                 |
| 57               | A               | A    | U28217    | 6.82E-55 | Protein tyrosine phosphatase STEP61                       |
| 56               | 14              | A    | X54149    | 9.96E-33 | MyD118                                                    |
| 23               | A               | A    | L28177    | 4.46E-13 | Ddit1/Gadd45                                              |
| 56               | A               | A    | X12616    | 2.22E-30 | c-Fes (tyrosine kinase)                                   |
| 54               | 26              | A    | AA124192  | 4.33E-08 | Lithium-sensitive myo-inositol monophosphatase A1         |
| 52               | A               | A    | U54803    | 2.98E-10 | Caspase-3/CPP32                                           |
| 52               | 25              | A    | U70324    | 2.51E-12 | Fyn proto-oncogene (Fyn/p59fyn)                           |
| 48               | 25              | A    | X55663    | 9.36E-11 | Protein tyrosine kinase, tec type I                       |
| 38               | 17              | A    | W83658    | 2.12E-09 | G protein $\gamma$ -2 subunit, homolog                    |
| 35               | A               | 45   | U43144    | 1.27E-14 | Phospholipase C $\beta$ 3                                 |
| 34               | A               | 27   | M57696    | 1.28E-12 | Lyn-B protein tyrosine kinase                             |
| 24               | A               | A    | W82116    | 7.60E-17 | Death-associated protein kinase 2, homolog                |
| 20               | A               | A    | L20899    | 4.25E-11 | Cdc25, homolog                                            |

#### Transcription factors

| $\gamma\delta$ T | $\alpha\beta$ T | Epi. | Accession | P value  | Description                   |
|------------------|-----------------|------|-----------|----------|-------------------------------|
| 1251             | 353             | 271  | M94087    | 5.52E-46 | ATF-4/CREB2                   |
| 478              | 167             | A    | M69293    | 2.64E-29 | Id-2                          |
| 59               | 11              | 188  | M31885    | 5.42E-16 | Id                            |
| 454              | 233             | 58   | J03236    | 6.14E-10 | Jun-B                         |
| 299              | 171             | 26   | X13605    | 1.19E-09 | H3 histone, family 3B (H3f3b) |
| 298              | 125             | 100  | V00727    | 1.62E-24 | c-Fos                         |

|                                |     |     |          |          |                                                           |     |    |     |          |          |                                                   |
|--------------------------------|-----|-----|----------|----------|-----------------------------------------------------------|-----|----|-----|----------|----------|---------------------------------------------------|
| 66                             | A   | 101 | X63023   | 4.09E-14 | Cytochrome P450, steroid inducible 3a13 (Cyp3a13)         | 281 | 80 | 50  | M63903   | 4.87E-37 | Max/Myn (Myc-associated factor X)                 |
| 26                             | 6   | A   | D50834   | 6.66E-06 | Cytochrome P450, subfamily IV B, polypeptide 1            | 27  | A  | 36  | X83106   | 2.41E-18 | Max dimerization protein (Mad)                    |
| 64                             | A   | 85  | U16818   | 1.46E-14 | UDP glucuronosyltransferase (UGT1-06)                     | 157 | 49 | A   | X16995   | 6.27E-09 | Nur77/N10/NGFI-B                                  |
| 59                             | 25  | A   | Z14986   | 3.83E-11 | S-adenosylmethionine decarboxylase 2 (Amd2)               | 152 | 99 | A   | M58566   | 4.46E-38 | Butyrate response factor 1/TIS11                  |
| 45                             | A   | 205 | Z13968   | 1.66E-17 | Creatine kinase, mitochondrial 1, ubiquitous (Ckmt1)      | 92  | 26 | A   | U19463   | 8.67E-26 | A20/TNF induced protein 3                         |
| 45                             | A   | 129 | M74570   | 1.07E-18 | Aldehyde dehydrogenase II                                 | 86  | 14 | A   | X89749   | 2.52E-32 | TG interacting factor (TGIF)                      |
| 36                             | A   | A   | U60987   | 1.15E-43 | Glycerol phosphate dehydrogenase 1, mitochondrial         | 76  | 24 | A   | U78312   | 3.89E-20 | Gfi-1                                             |
| 27                             | A   | 30  | U27014   | 5.67E-15 | Sorbitol dehydrogenase                                    | 70  | 24 | 61  | X67083   | 1.63E-18 | Ddit3/Chop-10/Gadd153                             |
| 138                            | 75  | A   | W99875   | 1.59E-22 | Pyruvate kinase 3 (Pk3), homolog                          | 68  | 33 | A   | AA023287 | 1.55E-08 | General transcription factor IIB (GTF2B), homolog |
| 45                             | A   | 106 | AA023491 | 8.19E-13 | Amiloride binding protein, homolog                        | 64  | 31 | A   | D42124   | 7.94E-12 | MafK                                              |
| 35                             | A   | A   | AA109909 | 1.60E-07 | Amiloride binding protein, homolog                        | 59  | A  | 104 | U70662   | 3.62E-23 | Kruppel-like factor 4 (gut) (Klf4/Ezf/Zie)        |
| 27                             | A   | 49  | J05663   | 1.85E-10 | Androgen-regulated vas deferens protein                   | 58  | A  | A   | D14636   | 7.79E-38 | PEBP2a1/PEBP2αA/CBFA1                             |
| Enzymes, nucleotide metabolism |     |     |          |          |                                                           |     |    |     |          |          |                                                   |
| 93                             | 32  | 218 | M10319   | 4.40E-20 | Adenosine deaminase (Ada)                                 | 57  | 30 | A   | AA015076 | 1.52E-07 | TSC-22-like protein, homolog                      |
| 46                             | 22  | A   | X56548   | 1.01E-15 | Purine nucleoside phosphorylase (Np-1)                    | 51  | 15 | A   | AA016424 | 4.91E-18 | X box-binding protein-1 (Xbp1)                    |
| 65                             | 24  | 99  | X75129   | 1.72E-25 | Xanthine oxidase/dehydrogenase                            | 51  | 21 | 36  | U20532   | 4.26E-14 | p45 NF-E2 related factor 2                        |
| 44                             | 13  | A   | L12059   | 3.48E-14 | CD73/ecto-5'-nucleotidase                                 | 49  | A  | A   | Z11664   | 3.57E-21 | Son of Sevenless 2                                |
| Protein processing/related     |     |     |          |          |                                                           |     |    |     |          |          |                                                   |
| 278                            | 175 | 30  | D78645   | 7.83E-11 | BiP                                                       | 48  | A  | A   | X62600   | 5.33E-34 | C/EBP β                                           |
| 151                            | 85  | 266 | J05185   | 1.55E-16 | Protein disulfide isomerase (ERp59)                       | 48  | A  | A   | M32489   | 2.13E-34 | Interferon consensus sequence binding protein     |
| 107                            | 21  | A   | AA144887 | 7.54E-21 | Cathepsin C (Ctsc)                                        | 47  | A  | A   | D38417   | 1.90E-35 | Arylhydrocarbon receptor                          |
| 72                             | 24  | 79  | U51014   | 5.02E-12 | Peptidase 4 (Pep4/prolidase)                              | 44  | A  | 73  | U19118   | 2.09E-17 | LRG-21                                            |
| 66                             | 35  | A   | AA124985 | 8.33E-10 | Insulin-degrading enzyme (IDE), homolog                   | 36  | A  | 41  | X62940   | 4.33E-30 | TSC-22                                            |
| 42                             | A   | A   | X92523   | 9.47E-15 | Calpain 3 (Capn3)                                         | 35  | 18 | A   | J04115   | 5.07E-07 | c-Jun                                             |
| 33                             | 13  | 37  | X59379   | 7.71E-12 | Amyloid β precursor (protease nexin II)                   | 33  | A  | A   | U08185   | 2.57E-38 | Blimp1                                            |
| 63                             | 34  | A   | U10119   | 3.38E-12 | Suppressor of K <sup>+</sup> transport defect 1 (Skd1)    | 20  | A  | A   | U16322   | 3.34E-09 | MITF-2B                                           |
| 56                             | 35  | 29  | D87990   | 2.56E-08 | UDP-galactose transporter related isozyme 1               | 19  | A  | A   | X76654   | 1.58E-06 | Ear-2                                             |
| 54                             | A   | A   | M85153   | 2.74E-21 | Glycoprotein galactosyltransferase α 1, 3 (Ggta1)         |     |    |     |          |          |                                                   |
| 22                             | A   | A   | X93999   | 1.19E-10 | Sialyltransferase 7                                       |     |    |     |          |          |                                                   |
| RNA-related                    |     |     |          |          |                                                           |     |    |     |          |          |                                                   |
| 213                            | 111 | 32  | M38381   | 2.62E-14 | CDC-like kinase (Clk/Sty)                                 |     |    |     |          |          |                                                   |
| 186                            | 141 | 247 | -        |          | 18SRNAMur-3                                               |     |    |     |          |          |                                                   |
| 153                            | 93  | 18  | AA008245 | 5.23E-10 | Polyadenylate-binding protein, homolog                    |     |    |     |          |          |                                                   |
| 103                            | 53  | A   | D78135   | 3.20E-09 | Cold-inducible RNA-binding protein (Cirbp)                |     |    |     |          |          |                                                   |
| 82                             | 46  | A   | M12130   | 6.59E-13 | RNA polymerase II 1 (Rpo2-1)                              |     |    |     |          |          |                                                   |
| 82                             | 21  | 25  | W90866   | 8.88E-29 | Elongation factor 2 (ef-2), homolog                       |     |    |     |          |          |                                                   |
| 71                             | 30  | A   | U75680   | 4.19E-15 | Stem loop-binding protein (Slbp)                          |     |    |     |          |          |                                                   |
| 47                             | 32  | A   | D83033   | 7.70E-07 | Nuclear protein 220 (Np220)                               |     |    |     |          |          |                                                   |
| 40                             | 15  | A   | AA125097 | 4.26E-14 | Ribonucleoprotein, homolog                                |     |    |     |          |          |                                                   |
| 40                             | 27  | A   | W82026   | 5.13E-16 | RNA-binding protein SCR3, homolog                         |     |    |     |          |          |                                                   |
| Other                          |     |     |          |          |                                                           |     |    |     |          |          |                                                   |
| 647                            | 79  | A   | M64292   | 5.92E-71 | B-cell translocation gene 2, anti-proliferative (BTG2)    |     |    |     |          |          |                                                   |
| 74                             | 40  | A   | Z72000   | 9.58E-10 | B-cell translocation gene 3 (BTG3/ANA)                    |     |    |     |          |          |                                                   |
| 383                            | 128 | 564 | X99807   | 1.23E-09 | Selenoprotein P                                           |     |    |     |          |          |                                                   |
| 275                            | A   | 375 | D13509   | 2.11E-23 | PAP homologous protein                                    |     |    |     |          |          |                                                   |
| 215                            | 92  | 39  | U37351   | 4.20E-12 | Paneth cell enhanced expression                           |     |    |     |          |          |                                                   |
| 204                            | 59  | 211 | X61433   | 1.00E-09 | ATPase, Na <sup>+</sup> /K <sup>+</sup> transporting, β 1 |     |    |     |          |          |                                                   |
| 124                            | 41  | A   | U10484   | 3.76E-25 | Jaw1                                                      |     |    |     |          |          |                                                   |
| 120                            | A   | 189 | D14010   | 2.32E-22 | RegI protein                                              |     |    |     |          |          |                                                   |
| 97                             | A   | 421 | AA123026 | 6.93E-22 | RegIIIγ protein                                           |     |    |     |          |          |                                                   |
| 101                            | A   | 196 | AA064246 | 1.10E-20 | Sodium-glucose cotransporter 1 (SGLT1)                    |     |    |     |          |          |                                                   |

|     |    |     |          |          |                                                     |
|-----|----|-----|----------|----------|-----------------------------------------------------|
| 36  | A  | 75  | W18827   | 6.60E-12 | Sodium-glucose cotransporter 1 (SGLT1)              |
| 128 | 47 | A   | L04961   | 5.90E-15 | Xist (X inactive specific transcript)               |
| 119 | 51 | 43  | M96823   | 3.31E-13 | Nucleobindin (Nucb)                                 |
| 95  | 41 | A   | U42386   | 1.14E-06 | Fibroblast growth factor-inducible 14 (Fin14)       |
| 78  | 40 | 100 | U53591   | 1.03E-31 | Fau-ps3 retropseudogene                             |
| 72  | 11 | 35  | M55154   | 5.86E-44 | Transglutaminase                                    |
| 68  | 26 | A   | D00812   | 9.87E-14 | Replication protein A2 (Rpa2)                       |
| 53  | 29 | A   | AA114648 | 6.04E-06 | Osteoclast-specific 116-kDa V-ATPase subunit(TIRC7) |
| 44  | 21 | 16  | D13003   | 2.49E-14 | Reticulocalbin                                      |
| 41  | 14 | A   | W40735   | 1.66E-13 | EH domain-containing protein EHD1 (mPAST1), hmlg.   |
| 37  | A  | 23  | U68064   | 1.42E-12 | Ceroid lipofuscinosis, neuronal 3, juvenile (Cln3)  |
| 35  | 19 | A   | X17459   | 4.41E-10 | J κ RS-binding protein                              |
| 27  | A  | 15  | M32032   | 3.33E-10 | Selenium-binding protein 1                          |
| 25  | A  | 86  | M32240   | 4.25E-26 | Pmp22/Gas3                                          |
| 24  | A  | 68  | U00478   | 1.16E-14 | DNaseI precursor                                    |
| 32  | A  | A   | M34897   | 2.89E-09 | Ecotropic viral integration site 2 (Evi2)           |
| 29  | A  | A   | M11024   | 1.80E-25 | Endogenous mammary tumor virus (MMTV)               |
| 82  | 41 | A   | AA154451 | 8.87E-11 | Unknown                                             |
