# Supplementary material
Source: PubMed Central journal article supplement (PMC56949)
Supplement: pnas_98_18_10261__7.pdf [file pnas_98_18_10261__7.pdf]

Table 8. Signal transduction and transcription factors preferentially expressed in MLN CD8+  $\alpha\beta$  T cells

Gene expression values are shown for  $\gamma\delta$  IELs ( $\gamma\delta$  T; averaged from all four samples) and MLN CD8+  $\alpha\beta$  T cells ( $\alpha\beta$  T; averaged from all six samples).

### Signal transduction

| $\gamma\delta$ T | $\alpha\beta$ T | Accession | Description                        |
|------------------|-----------------|-----------|------------------------------------|
| 1944             | 9792            | X75313    | Receptor for activated C kinase    |
| 38               | 199             | U20238    | GTPase-activating protein GapIII   |
| A                | 134             | AA066032  | Diacylglycerol kinase, $\alpha$    |
| 15               | 117             | AA066354  | Jak1, homolog                      |
| A                | 111             | AA110453  | Diacylglycerol kinase, $\alpha$    |
| A                | 83              | L11330    | Dual-specificity phosphatase PAC-1 |
| A                | 51              | D11091    | Protein kinase C, $\theta$         |

### Transcription factors

| $\gamma\delta$ T | $\alpha\beta$ T | Accession | Description              |
|------------------|-----------------|-----------|--------------------------|
| A                | 554             | U25096    | Kruppel-like factor LKLF |
| 18               | 407             | U05252    | SATB1                    |
| 27               | 148             | AA015486  | RFLAT-1, homolog         |
| 12               | 144             | X61385    | TCF-1                    |
| A                | 140             | D16503    | LEF-1                    |
| A                | 73              | U36340    | Kruppel-like factor 3    |
| A                | 60              | J04179    | HMG-I(Y)                 |
